# Supplementary material for: Morpho-Physiological and Transcriptome Changes in Tomato Anthers of Different Developmental Stages under Drought Stress
Source: MDPI journal article supplement (doi:10.3390/cells10071809), 2021-07-17
Supplement: s1 [file s1]

**Table S2.** Summary of the number of floral buds used in the analysis of flowering phenology, floral bud abortion, opened flower abortion and fruit set.

|       | No. of buds | No. of aborted buds | No. of opened flow-<br>ers | No. of opened flow-<br>ers that aborted | No. of opened flow-<br>ers that set fruits |
|-------|-------------|---------------------|----------------------------|-----------------------------------------|--------------------------------------------|
| WW    | 521         | 0                   | 521                        | 118                                     | 403                                        |
| DS    | 492         | 122                 | 370                        | 190                                     | 180                                        |
| Total | 1013        | 122                 | 891                        | 308                                     | 583                                        |

Values are totals of 3 biological replicates each with 4 plants, 6 trusses/plant. WW, well-watered; DS, drought stressed.

**Table S3.** Correlations between replications of gene expression levels.

| Developmental stage              | Treatment | Rep.1 vs. Rep. 2 | Rep.1 vs. Rep. 3 | Rep.2 vs. Rep. 3 |
|----------------------------------|-----------|------------------|------------------|------------------|
| PMC-MEI ( $\leq 2.8$ mm)         | WW        | 0.99             | 0.99             | 0.99             |
| TED-VUM ( $\geq 4$ mm<br><6.5mm) | WW        | 0.98             | 0.95             | 0.96             |
| (BIN-MP ( $> 7.0$ mm )           | WW        | 0.97             | 0.93             | 0.95             |
| PMC-MEI ( $\leq 2.5$ mm)         | DS        | 0.99             | 0.98             | 0.98             |
| TED-VUM ( $\geq 4$ mm<br><6.5mm) | DS        | 0.91             | 0.97             | 0.86             |
| BIN-MP ( $> 7.0$ mm )            | DS        | 0.97             | 0.97             | 0.97             |

WW, Well-watered; DS, Drought-stressed; PMC- MEI, anthers at pollen mother cell to meiotic stage; TED-VUM, anther at tetrad to uninucleate microspore stages; BIN-MP, anther a binucleate to mature pollen stage.

**Table S4.** Summary of reads and mapping information.

| Sample name      | Total       | Average    | Percentage |
|------------------|-------------|------------|------------|
| Total reads      | 924,197,894 | 51,344,327 |            |
| Total mapped     | 878,030,710 | 48,779,484 | 95.0       |
| Multiple mapped  | 15,951,975  | 886,221    | 1.8        |
| Uniquely mapped  | 862,078,735 | 47,893,263 | 98.2       |
| Reads map to '+' | 430,424,146 | 23,912,453 | 50         |
| Reads map to '-' | 431,654,589 | 23,980,811 | 50         |

Values are averages of 3 independent biological replicates.
